# Supplementary material for: Hedgehog Signaling Regulates Neurogenesis in the Larval and Adult Zebrafish Hypothalamus
Source: eNeuro. 2020 Dec 18;7(6):ENEURO.0226-20.2020. doi: 10.1523/ENEURO.0226-20.2020 (PMC7769882; doi:10.1523/ENEURO.0226-20.2020)
Supplement: Extended Data Figure 7-1 — Source data for graphs in Figure 7. Spreadsheet with GFP+, PCNA+, BrdU+ cell quantification and image intensity data used to generate graphs in Figure 7, with exact p values. Download Figure 7-1, XLSX file. [file enu-eN-NWR-0226-20-s05.xlsx]

## Sheet: Fig 7F Source data
Columns A&C give the % of Nestin+ cells that were BrdU positive (A) or PCNA + (C) in each 20µm section through the adult PR
Columns B&D show the % of Hh-responsive cells that were BrdU positive (B) or PCNA + (D) in each 20µm section through the adult PR
nes:GFP+/BrdU+	ptch2GFP+/BrdU+	nes:GFP+/PCNA+	ptch2:GFP+/PCNA+
4	5	0	17.5
2	2.77	0	9
2	1.8	0	7
0	2	0	7.6
1	1.46	0	8.8
1	1.66	0	13
4	4.9	0	16
2	11.76	1	16.5
2.6	7.2	0	9.6
3	3.6	0	3.6
2	7.3	0	29
1	4.68	0	11
3		0
3		0
4		1
2.5		2.5
1		1
1.5		1.6
1		1
2		1
3		0
0		0
1		0
1		1.9
3		2
2		1
1		2.6
1.3		1
3.4		1
0		2
0		1.8
1		1
0.6		0
1		0.8
1		0.8
1		0
3		0
0		0.8
0		0.9
0		1
3		0

## Sheet: Fig 7G Source Data
Intesnsity of GFP fluorescence in the nes:GFP reporter (Colume A) and the Hh signaling reporter (Column B)
Arbitrary Intensity Units measured using imageJ
nes:GFP+ Cells	ptch:GFP+ Cells
359.675	467
494.188	942.663
783.05	397.637
911.212	344.613
412.413	313.85
372.775	597.725
626.9	365.875
430.663	688.212
631.562	278.65
491	802.525
1051.75	410.475
487.688	988.337
529.888	296.512
292.688	357.038
382.512	302.6
444	279.825
348.337	327.113
341.6	206.775
399.337	539
320.038	801.337
1129.65	673.925
810.663	258.225
834.85	239.325
1164.26	220.852
1316	227.298
394.012	617.987
668.175	327.85
449.925	595.663
368.275	291.587
319.688	486.587
962.638	252.25
863.888	221.412
730.164	313.575
841.667	377.075
562.266	230.5
959.153	659.6
424.243	461.337
563.508	259.075
486.384	193.838
	152.787
	228.137
	183.578
	433.625
	227.3
	327.7
	787.45
	350.65
	159.625
	138.675
	219.762
	384.339
	508.045
	566.429
	525.321
	583.339
	1026.12
614.377	418.189

## Sheet: Fig. 7L Source data
Cell counts used to determine the % of Hh-responsive, Notch-Responsive, Shh-producing, and Wnt-responsive cells in the PR that expressed the PCNA antigen at 7dpf
	section #	LR PCNA+ & mCh+	LR mCh+ total	LR PCNA+ & mCh+	LR mCh+ total
Tg(GBS-ptch2:nlsmCherry) line (Hh-resp)	Fish 1.1	17	17
	Fish 1.2	7	20	13	51
	Fish 1.3	4	14	21	26
	Fish 1.4	2	7	33	37
	Fish 1.5	3	9	ND	ND
	Fish 2.1	8	17	34	39
	Fish 2.2	9	9	33	33
	Fish 2.3	30	30	ND	ND
	Fish 2.5	9	19	20	32
	Fish 3.1	11	15	37	40
	Fish 3.4	8	13	23	30
	Fish 3.5 very lat	2	7	ND	ND
	Totals	110	177	214	288
		% dbl+	0.621469		0.743056
		PR PCNA+ & GFP+	PR GFP+ total
Tg(tp1bglob:GFP) line (Notch-resp)	Fish 1.1 Lat	5	16
	Fish 1.2 mid	3	18
	Fish 2.1 edge of PR	4	4
	Fish 2.2 lat	3	13
	Fish 2.3 lat	1	10
	Fish 2.4 lat	4	15
	Fish 2.5 lat	1	11
	Fish 3.1 mid NO COUNT	0	0
	Fish 3.2 No Count	0	0
	Fish 3.7	1	11
	Fish 3.8	5	15
	Total	27	113
		% dbl+	0.238938
Tg(shha:GFP) line (Shh-prod)	Fish 4.1	3	20
	Fish 4.2	0	10
	Fish 4.3	1	25
	Fish 5.1	2	4
	Fish 5.3	0	21
	Fish 5.4	3	21
	Fish 6.1 lat	2	27
	Fish 6.2 lat	2	18
	Fish 6.3 mid	0	8
	Fish 6.4 mid, no PR hh	0	0
	Fish 6.5 lat	3	14
	Fish 6.6.	2	9
	Fish 6.7	1	7
	Fish 6.8mid/	0	2
	Fish 6.9 mid no PR	0	0
	Total	19	186
		% dbl+	0.102151
Tg(tcfsiam:GFP) line (Wnt-resp)	Fish 3.1 Lat	0	9
	Fish 3.2 Lat	0	15
	Fish 3.3 Lat	0	11
	Fish 3.4 Mid	0	18
	Fish 3.5 Mid	0	14
	Fish 3.6 Mid	0	7
	Fish 4.1 mid	0	6
	Fish 4.2 lat	0	19
	Fish 4.3 lat	0	21
	Fish 4.4 lat	0	18
	Fish 4.5 mid	0	10
	Fish 4.6 lat	0	9
	Fish 5.1 lat	0	23
	Fish 5.2 lat	0	25
	Fish 5.3 M	0	18
	Fish 5.4 (M-L1)	0	9
	Fish 5.5 (L)	0	17
	Fish 5.6 (L)	0	17
	total	0	266
		% dbl+	0

## Sheet: Exact p values (95% confidence)
Figure 7F Nestin+/BrdU+ vs. Hh-R+/BrdU+ cells	< 0.0001
Figure 7F Nestin+/PCNA+ vs. Hh-R+/PCNA+ cells	< 0.0001
Figure 7G BrdU intensity Nestin+ vs. Hh-R+ cells	0.0002
