# Supplementary material for: Hedgehog Signaling Regulates Neurogenesis in the Larval and Adult Zebrafish Hypothalamus
Source: eNeuro. 2020 Dec 18;7(6):ENEURO.0226-20.2020. doi: 10.1523/ENEURO.0226-20.2020 (PMC7769882; doi:10.1523/ENEURO.0226-20.2020)
Supplement: Extended Data Figure 8-1 — Source data for graphs in Figure 8. Spreadsheet with serotonergic cell quantification data used to generate graph in Figure 8, with exact p values. Download Figure 8-1, XLSX file. [file enu-eN-NWR-0226-20-s06.xlsx]

## Sheet: Fig 8K Source data
Number of Serotonin expressing cells in the PR Following Hh manipulation using the Tet-On System.
Doxcycine treatment was from 5-6 dpf (t=24h, columns B-D) or from 5-7dpf (t=48h, columns E-G)
	Sibling Control	shh-mCh	gli2DR-mCh	Sibling Control	shh-mCh	gli2DR-mCh
t = 0, 5dpf	t = 24h, 6dpf	t = 24h, 6dpf	t = 24h, 6dpf	t = 48h, 7dpf	t = 48h, 7dpf	t = 48h, 7dpf
70	80	80	53	90	98	62
68	81	94	50	85	88	57
70	85	98	58	94	90	65
73	73	102	83	75	113	63
64	76	101	80	96	115	68
74	81	86	81	92	88	57
66	82	100	82	81	96	46
72	75	88	81	81	105	46
60	77	96	80	79	101	47
61	78	88	81	82	120	47
61	78	92		76
62	76	91		76
70	80	102
	79	100
	83	90
	79	91
	80	96
	107
	108
	106
	100
67	84	93.8235	72.9	83.9167	101.4	55.8

## Sheet: Exact p values (95% confidence)
Figure8K Sib. Control vs 24h Dox shh-mCh TetON (increased Hh Signaling)	0.0278
Figure8K Sib. Control vs 24h Dox gli2aDR-mCh TetON (decreased Hh Signaling )	0.0401
Figure8K Sib. Control vs 48h Dox shh-mCh TetON (increased Hh Signalingh)	0.0006
Figure8K Sib. Control vs 48h Dox gli2aDR-mCh TetON (decreased Hh Signaling)	< 0.0001
